# Supplementary material for: BiOCOOH hierarchical nanostructures: Shape-controlled solvothermal synthesis and photocatalytic degradation performances
Source: Royal Society of Chemistry journal article supplement (doi:10.1039/c0ce00705f), 2011-01-01

***Supporting Information***

**for**

**BiOCOOH hierarchical nanostructures: Shape-controlled solvothermal  
synthesis and photocatalytic degradation performances**

**Jinyan Xiong, Gang Cheng, Zhong Lu, Jiale Tang, Xianglin Yu, Rong Chen\***

Key Laboratory for Green Chemical Process of Ministry of Education and School of Chemical  
Engineering and Pharmacy, Wuhan Institute of Technology, Xiongchu street, Wuhan, 430073,  
PR China

**\* To whom correspondence should be addressed**

Prof. R. Chen, E-mail: rchenhku@hotmail.com

Tel.: (+86)13659815698; fax: (+86)2787194465.

**Fig. S11** XRD pattern of the as-synthesized product prepared by solvothermal method at 150 °C in H<sub>2</sub>O.

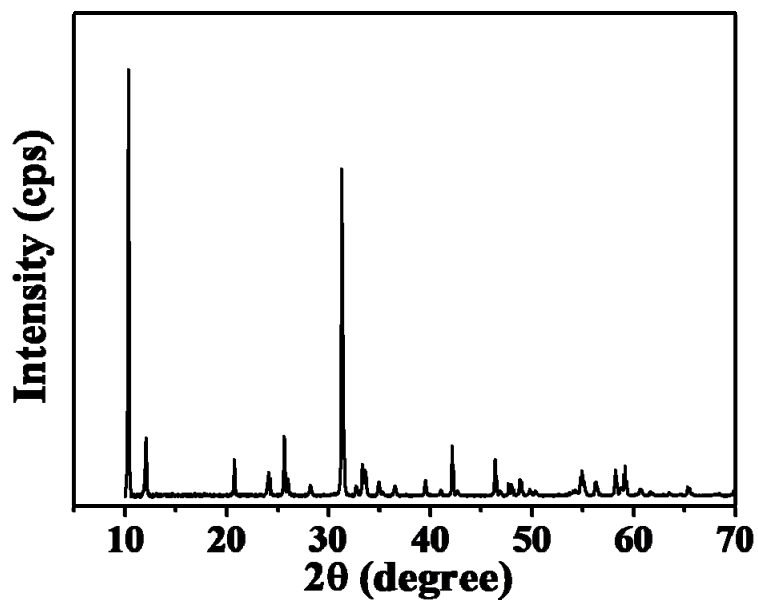

**Fig. SI2** The pH values of the solvents and the reaction system (including  $\text{Bi}(\text{NO}_3)_3 \cdot 5\text{H}_2\text{O}$  and  $\text{HCOONa} \cdot 2\text{H}_2\text{O}$ ) before and after solvothermal treatment.

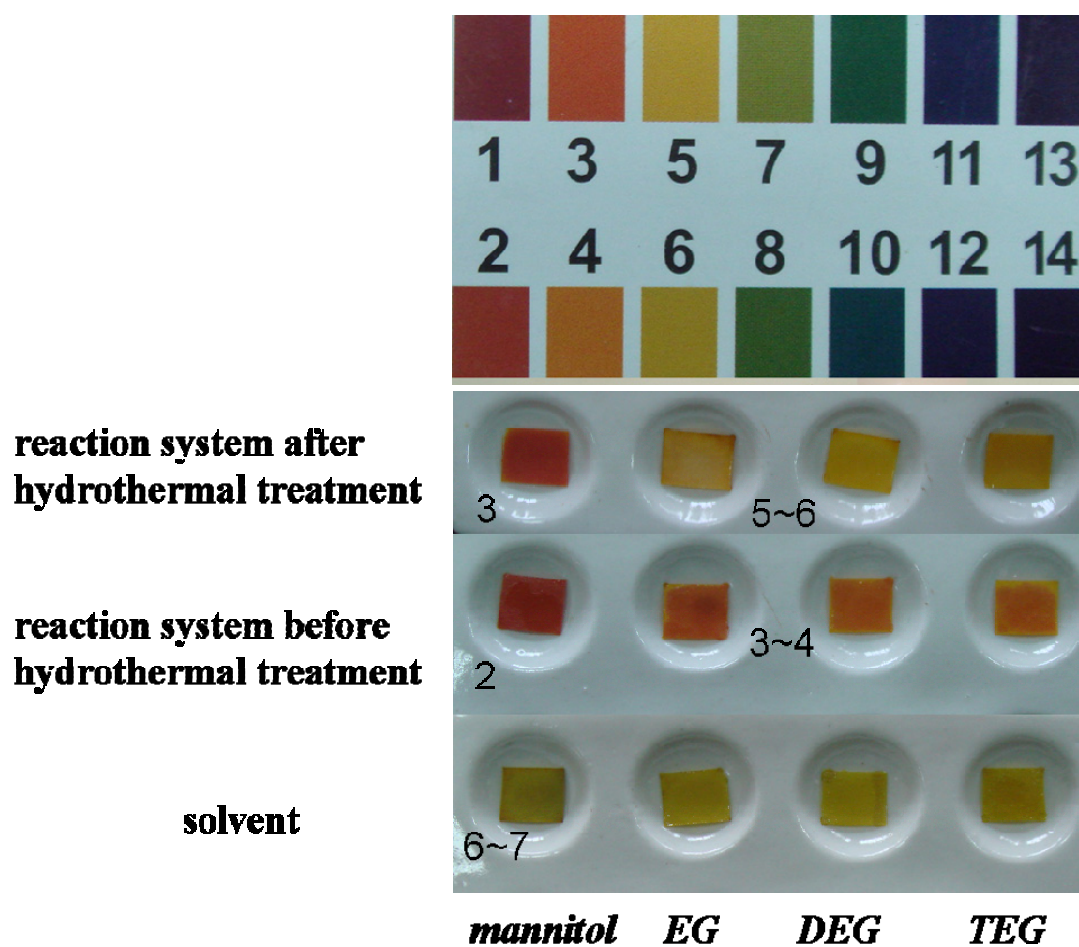

Supplement: c0ce00705f.pdf [file c0ce00705f.pdf]
